# Supplementary material for: Emotion Recognition for Human-Robot Interaction: Recent Advances and Future Perspectives
Source: Frontiers journal article supplement (doi:10.3389/frobt.2020.532279), 2020-12-21
Supplement: Data_Sheet_1.pdf [file Data_Sheet_1.pdf]

## ***Supplementary Material***

### **APPENDIX A - DATASETS FOR EMOTION RECOGNITION**

The following table aims to provide a list of available datasets for emotion recognition from different sources. For each entry, we indicate (if possible): available data sources, number of participants, emotional labels, methods for inducing emotions. In order to make the table available and constantly updated, we provide a GitLab repository <sup>1</sup>. Please refer to that repository for downloading the newest version (with source files) and for reporting missing references.

---

<sup>1</sup> <https://gitlab.com/matteo.spezialetti/datasets-for-emotion-recognition>

| Dataset                                                               | Data                                                                                    | Subjects      | Labeling<br>(S=self-assessment,<br>E=external annotation)                                                                                         | Emotion Induction                       | Notes                   |
|-----------------------------------------------------------------------|-----------------------------------------------------------------------------------------|---------------|---------------------------------------------------------------------------------------------------------------------------------------------------|-----------------------------------------|-------------------------|
| KDEF<br>(Lundqvist et al., 1998)                                      | Facial images                                                                           | 70            | Discrete (E):<br>7 labels                                                                                                                         | Poses                                   | -                       |
| JAFPE<br>(Lyons et al., 1998)                                         | Frontal images                                                                          | 10            | Discrete (E):<br>6 labels                                                                                                                         | Poses                                   | -                       |
| Database of<br>German Emotional<br>Speech<br>(Burkhardt et al., 2005) | Speech                                                                                  | 10            | Discrete (E):<br>7 labels;<br>Dimensional (E):<br>Valence,<br>Arousal,<br>Dominance                                                               | Simulated<br>emotions                   | -                       |
| BU-3DFE<br>(Yin et al., 2006)                                         | 3D shape models;<br>2D face textures                                                    | 100           | Discrete (S):<br>6 labels<br>(4 intensities)<br>+ neutral                                                                                         | Poses                                   | -                       |
| Bosphorus<br>(Savran et al., 2008)                                    | 3D shape models;<br>2D face textures                                                    | 105           | Discrete (S):<br>9 labels                                                                                                                         | Poses                                   | AUs annotations         |
| IEMOCAP<br>(Busso et al., 2008)                                       | Motion Capture;<br>Speech;                                                              | 10            | Discrete (E):<br>9 labels;<br>Dimensional (E):<br>Valence,<br>Arousal,<br>Dominance                                                               | Performing in<br>emotional<br>scenarios | -                       |
| CINEMO<br>(Rollet et al., 2009)                                       | Speech;                                                                                 | 50            | Discrete (E):<br>16 labels<br>+ 6 macro classes; Dimensional (E):<br>Valence,<br>Activation,<br>Control<br>Suddenness<br>Intensity<br>Naturalness | Dubbing<br>movies                       | -                       |
| JEMO<br>(Brendel et al., 2010)                                        | Speech;                                                                                 | 39            | Discrete (E):<br>4 labels                                                                                                                         | Emotions<br>detection game              | -                       |
| NIMITEK<br>(Gnjatovic and Rosner, 2010)                               | Videos;<br>Speech;<br>Desktop;                                                          | 10            | Discrete (E):<br>8 labels                                                                                                                         | Performing<br>tasks on PC               | German language         |
| NVIE<br>(Wang et al., 2010)                                           | Videos; Thermal maps                                                                    | 215           | Dimensional (S and E):<br>Valence,<br>Arousal<br>Discrete (S and E):<br>6 labels                                                                  | Emotional<br>videos; Poses              | -                       |
| Inter-ACT<br>(Castellano et al., 2010)                                | Short videos (6s):<br>face (frontal, lateral),<br>full body;<br>contextual game<br>data | 8<br>children | Dimensional (E):<br>Valence,<br>Interest                                                                                                          | -                                       | HRI with iCat           |
| Extended<br>Cohn-Kanade (CK+)<br>(Lucey et al., 2010)                 | Frame sequences<br>(9-60 frames):<br>face (frontal, lateral)                            | 210           | Discrete (S):<br>6 labels                                                                                                                         | -                                       | FACS annotations<br>(?) |

|                                                                        |                                                                                                      |                             |                                                                                                                                                  |                                                             |                                                                                                   |
|------------------------------------------------------------------------|------------------------------------------------------------------------------------------------------|-----------------------------|--------------------------------------------------------------------------------------------------------------------------------------------------|-------------------------------------------------------------|---------------------------------------------------------------------------------------------------|
| DEAP<br>(Koelstra et al., 2011)                                        | EEG;<br>GSR;<br>Respiration;<br>Skin temperature;<br>ECG;<br>Blood volume;<br>EMG;<br>Frontal videos | 32                          | Dimensional (S): Valence,<br>Arousal,<br>Dominance,<br>Liking                                                                                    | Music videoclips                                            | -                                                                                                 |
| MAHNOB HCI<br>(Soleymani et al., 2011)                                 | EEG;<br>Eye gaze;<br>GSR;<br>Respiration;<br>Skin temperature;<br>ECG;<br>Face/body videos           | 27                          | Dimensional (S):<br>Valence,<br>Arousal,<br>Dominance,<br>Predictability;<br>Discrete (S):<br>9 labels                                           | Movies excerpts                                             | -                                                                                                 |
| Belfast<br>(Sneddon et al., 2011)                                      | Videos;<br>Speech                                                                                    | 114(T1)<br>82(T2)<br>60(T3) | Discrete (S/E):<br>8 labels                                                                                                                      | 3 different<br>induction tasks                              |                                                                                                   |
| SEMAINE<br>(McKeown et al., 2011)                                      | Face videos;<br>Speech                                                                               | 150                         | Dimensional (E):<br>Valence, Arousal                                                                                                             | Conversations<br>with an agent                              | FACS annotations<br>(?)                                                                           |
| FER2013<br>(Goodfellow et al., 2013)                                   | Images from web<br>queries                                                                           | -                           | Discrete (S):<br>7 labels                                                                                                                        | -                                                           | 35,887 images                                                                                     |
| MPI Emotional<br>Body Expression<br>Database<br>(Volkova et al., 2014) | Motion Capture<br>Videos (23 joints)                                                                 | 8                           | Discrete (E):<br>11 labels                                                                                                                       | Acting in<br>non-verbal<br>scenarios and<br>short sentences | -                                                                                                 |
| EmoReact<br>(Nojavanasghari et al., 2016)                              | Videos                                                                                               | 63<br>children              | Dimensional (E):<br>Valence;<br>Discrete (E):<br>16 labels                                                                                       | -                                                           | -                                                                                                 |
| ASCERTAIN<br>(Subramanian et al., 2016)                                | EEG;<br>GSR;<br>ECG;<br>Face videos;                                                                 | 58                          | Dimensional (S):<br>Valence, Arousal                                                                                                             | Movies excerpts                                             | Big-Five personality traits<br>annotations<br>(?)                                                 |
| AffectNet<br>(Mollahosseini et al., 2017)                              | Images from web<br>queries                                                                           | -                           | Categorical (E):<br>11 labels;<br>Dimensional (E):<br>Valence,<br>Arousal                                                                        | -                                                           | 450,000 images                                                                                    |
| AMIGOS<br>(Correa et al., 2018)                                        | EEG;<br>GSR;<br>ECG;<br>Face/body videos;<br>Body depth maps                                         | 40                          | Dimensional (S):<br>Valence, Arousal,<br>Dominance, Liking<br>Familiarity;<br>Dimensional (E):<br>Valence, Arousal;<br>Discrete (S):<br>7 labels | Movies excerpts                                             | Individual and group sessions;<br>Big-Five personality traits<br>(?);<br>PANAS annotations<br>(?) |
| JL-Corpus<br>(James et al., 2018)                                      | Speech                                                                                               | 4                           | Discrete (E):<br>10 labels                                                                                                                       | Acting                                                      | New Zealand<br>English                                                                            |
| CAER<br>(Lee et al., 2019)                                             | Videoclips from<br>TV shows                                                                          | -                           | Discrete (E):<br>7 labels                                                                                                                        | -                                                           | Context labeling<br>13,201 clips,<br>1,107,877 frames                                             |

Table S1: Datasets for emotion recognition.

## REFERENCES

- Brendel, M., Zaccarelli, R., and Devillers, L. (2010). Building a system for emotions detection from speech to control an affective avatar. In *LREC*
- Burkhardt, F., Paeschke, A., Rolfes, M., Sendlmeier, W. F., and Weiss, B. (2005). A database of german emotional speech. In *Ninth European Conference on Speech Communication and Technology*
- Busso, C., Bulut, M., Lee, C.-C., Kazemzadeh, A., Mower, E., Kim, S., et al. (2008). Iemocap: Interactive emotional dyadic motion capture database. *Language resources and evaluation* 42, 335
- Castellano, G., Leite, I., Pereira, A., Martinho, C., Paiva, A., and McOwan, P. W. (2010). Inter-act: An affective and contextually rich multimodal video corpus for studying interaction with robots. In *Proceedings of the 18th ACM international conference on Multimedia (ACM)*, 1031–1034
- Correa, J. A. M., Abadi, M. K., Sebe, N., and Patras, I. (2018). Amigos: A dataset for affect, personality and mood research on individuals and groups. *IEEE Transactions on Affective Computing*
- Gnjatovic, M. and Rosner, D. (2010). Inducing genuine emotions in simulated speech-based human-machine interaction: The nimitex corpus. *IEEE Transactions on Affective Computing* 1, 132–144
- Goodfellow, I. J., Erhan, D., Carrier, P. L., Courville, A., Mirza, M., Hamner, B., et al. (2013). Challenges in representation learning: A report on three machine learning contests. In *International Conference on Neural Information Processing (Springer)*, 117–124
- James, J., Tian, L., and Watson, C. I. (2018). An open source emotional speech corpus for human robot interaction applications. In *INTERSPEECH*. 2768–2772
- Koelstra, S., Muhl, C., Soleymani, M., Lee, J.-S., Yazdani, A., Ebrahimi, T., et al. (2011). Deap: A database for emotion analysis; using physiological signals. *IEEE transactions on affective computing* 3, 18–31
- Lee, J., Kim, S., Kim, S., Park, J., and Sohn, K. (2019). Context-aware emotion recognition networks. In *Proceedings of the IEEE International Conference on Computer Vision*. 10143–10152
- Lucey, P., Cohn, J. F., Kanade, T., Saragih, J., Ambadar, Z., and Matthews, I. (2010). The extended cohn-kanade dataset (ck+): A complete dataset for action unit and emotion-specified expression. In *2010 IEEE computer society conference on computer vision and pattern recognition-workshops (IEEE)*, 94–101
- Lundqvist, D., Flykt, A., and Öhman, A. (1998). The karolinska directed emotional faces (kdef). *CD ROM from Department of Clinical Neuroscience, Psychology section, Karolinska Institutet* 91, 2–2
- Lyons, M., Akamatsu, S., Kamachi, M., and Gyoba, J. (1998). Coding facial expressions with gabor wavelets. In *Proceedings Third IEEE international conference on automatic face and gesture recognition (IEEE)*, 200–205
- McKeown, G., Valstar, M., Cowie, R., Pantic, M., and Schroder, M. (2011). The semaine database: Annotated multimodal records of emotionally colored conversations between a person and a limited agent. *IEEE transactions on affective computing* 3, 5–17
- Mollahosseini, A., Hasani, B., and Mahoor, M. H. (2017). Affectnet: A database for facial expression, valence, and arousal computing in the wild. *IEEE Transactions on Affective Computing* 10, 18–31
- Nojavanasghari, B., Baltrušaitis, T., Hughes, C. E., and Morency, L.-P. (2016). Emoreact: a multimodal approach and dataset for recognizing emotional responses in children. In *Proceedings of the 18th acm international conference on multimodal interaction*. 137–144
- Rollet, N., Delaborde, A., and Devillers, L. (2009). Protocol cinema: The use of fiction for collecting emotional data in naturalistic controlled oriented context. In *2009 3rd International Conference on Affective Computing and Intelligent Interaction and Workshops (IEEE)*, 1–6
- Savran, A., Alyüz, N., Dibeklioglu, H., Çeliktutan, O., Gökberk, B., Sankur, B., et al. (2008). Bosphorus database for 3d face analysis. In *European Workshop on Biometrics and Identity Management (Springer)*,

---

47–56

- Sneddon, I., McRorie, M., McKeown, G., and Hanratty, J. (2011). The belfast induced natural emotion database. *IEEE Transactions on Affective Computing* 3, 32–41
- Soleymani, M., Lichtenauer, J., Pun, T., and Pantic, M. (2011). A multimodal database for affect recognition and implicit tagging. *IEEE transactions on affective computing* 3, 42–55
- Subramanian, R., Wache, J., Abadi, M. K., Vieri, R. L., Winkler, S., and Sebe, N. (2016). Ascertain: Emotion and personality recognition using commercial sensors. *IEEE Transactions on Affective Computing* 9, 147–160
- Volkova, E., De La Rosa, S., Bülhoff, H. H., and Mohler, B. (2014). The mpi emotional body expressions database for narrative scenarios. *PloS one* 9
- Wang, S., Liu, Z., Lv, S., Lv, Y., Wu, G., Peng, P., et al. (2010). A natural visible and infrared facial expression database for expression recognition and emotion inference. *IEEE Transactions on Multimedia* 12, 682–691
- Yin, L., Wei, X., Sun, Y., Wang, J., and Rosato, M. J. (2006). A 3d facial expression database for facial behavior research. In *7th international conference on automatic face and gesture recognition (FGR06)* (IEEE), 211–216
